# Supplementary material for: The architecture of cell differentiation in choanoflagellates and sponge choanocytes
Source: PLoS Biol. 2019 Apr 12;17(4):e3000226. doi: 10.1371/journal.pbio.3000226 (PMC6481868; doi:10.1371/journal.pbio.3000226)
Supplement: S1 Data — (XLSX) [file pbio.3000226.s023.xlsx]

## Sheet: Fig 2C
	Cell ID	S1	S2	S3		C1	C2	C3
	Type	Single	Single	Single		Colonial	Colonial	Colonial
Volumetric Proportion (%)	Endoplasmic Reticulum	2.87206	3.4632	3.48576		6.45844	7.24234	6.88666
	Endocytotic Vacuoles	0.149198	0	0.0749625		0.317628	0.185701	0.430416
Number scaled against cell size (µm-3)	Endocytotic Vacuoles	0.0372995	0	0.0374813		0.26469	0.139276	0.167304
	Pseudopodia	0	0.0309215	0.0749625		0.317628	0.371402	0.239006
	Mitochondria	1.19358	0.649351	0.824588		0.0529381	0.139276	0.215105
	Golgi associated vesicles	5.22193	6.27706	5.84708		3.38804	2.36769	2.43786

## Sheet: Fig 3N
Colony ID	Cell Number	Cell Volume (µm3)
RC1	1	18.75
RC1	2	15.82
RC1	3	29.38
RC1	4	36.21
RC1	5	35.96
RC1	6	22.12
RC1	7	22.5
RC2	1	33.95
RC2	2	22.22
RC2	3	24.23
RC2	4	24.39
RC2	5	25.08
RC2	6	27.65
RC2	7	28.26
RC2	8	24.11
RC2	9	21.24
RC2	10	20.08
RC2	11	29.74
RC3	1	23.29
RC3	2	25.33
RC3	3	31.34
RC3	4	25.33
RC3	5	9.87
RC3	6	47.5
RC3	7	21.37
RC3	8	33.44
RC3	9	28.72
RC3	10	22.91
RC3	11	30.24
RC3	12	29.21
RC4	1	17.26
RC4	2	34.02
RC4	3	29.98
RC4	4	30.27
RC4	5	13.35
RC4	6	24.06
RC4	7	30.18
RC4	8	34.82
RC4	9	26.28
RC4	10	24.61
RC5	1	38.02
RC5	2	29.11
RC5	3	36.76
RC5	4	33.09
RC5	5	40.6
RC5	6	25.91
RC5	7	35.87
RC5	8	22.64
RC5	9	34.03
RC5	10	23.9

## Sheet: Fig S4A
Colony ID	Cell Number	Cell Volume (µm3)	No. of Bridges	Connects to Cell No.
RC1	1	18.75	1	4
RC1	2	15.82	0	-
RC1	3	29.38	0	-
RC1	4	36.21	1	1
RC1	5	35.96	1	Disconnected
RC1	6	22.12	1	7
RC1	7	22.5	1	6
RC2	1	33.95	2	2,5
RC2	2	22.22	2	1,8
RC2	3	24.23	1	4
RC2	4	24.39	4	3,5,Disconnected,7
RC2	5	25.08	3	1,4,10
RC2	6	27.65	1	8
RC2	7	28.26	2	11,4
RC2	8	24.11	2	9,6
RC2	9	21.24	1	8
RC2	10	20.08	1	5
RC2	11	29.74	1	7
RC3	1	23.29	1	2
RC3	2	25.33	2	1,7
RC3	3	31.34	1	7
RC3	4	25.33	1	11
RC3	5	9.87	1	6
RC3	6	47.5	2	5,8
RC3	7	21.37	2	2,3
RC3	8	33.44	2	12,6
RC3	9	28.72	1	10
RC3	10	22.91	2	9,11
RC3	11	30.24	3	4,10,12
RC3	12	29.21	2	8,11
RC4	1	17.26	2	2,3
RC4	2	34.02	1	1
RC4	3	29.98	3	1,4,6
RC4	4	30.27	2	3,9
RC4	5	13.35	1	6
RC4	6	24.06	2	3,5
RC4	7	30.18	2	9,10
RC4	8	34.82	0	-
RC4	9	26.28	2	4,7
RC4	10	24.61	1	7
RC5	1	38.02	0	-
RC5	2	29.11	0	-
RC5	3	36.76	1	5
RC5	4	33.09	2	Disconnected, 8
RC5	5	40.6	2	3,6
RC5	6	25.91	1	5
RC5	7	35.87	2	8,9
RC5	8	22.64	2	7,4
RC5	9	34.03	1	7
RC5	10	23.9	0	-

## Sheet: Fig S4B
Colony ID	Cell Number	Number of Bridges	Connects to Cell Number
RC1	1	1	4
RC1	2	0	-
RC1	3	0	-
RC1	4	1	1
RC1	5	1	Disconnected
RC1	6	1	7
RC1	7	1	6
RC2	1	2	2,5
RC2	2	2	1,8
RC2	3	1	4
RC2	4	4	3,5,Disconnected,7
RC2	5	3	1,4,10
RC2	6	1	8
RC2	7	2	11,4
RC2	8	2	9,6
RC2	9	1	8
RC2	10	1	5
RC2	11	1	7
RC3	1	1	2
RC3	2	2	1,7
RC3	3	1	7
RC3	4	1	11
RC3	5	1	6
RC3	6	2	5,8
RC3	7	2	2,3
RC3	8	2	12,6
RC3	9	1	10
RC3	10	2	9,11
RC3	11	3	4,10,12
RC3	12	2	8,11
RC4	1	2	2,3
RC4	2	1	1
RC4	3	3	1,4,6
RC4	4	2	3,9
RC4	5	1	6
RC4	6	2	3,5
RC4	7	2	9,10
RC4	8	0	-
RC4	9	2	4,7
RC4	10	1	7
RC5	1	0	-
RC5	2	0	-
RC5	3	1	5
RC5	4	2	Disconnected, 8
RC5	5	2	3,6
RC5	6	1	5
RC5	7	2	8,9
RC5	8	2	7,4
RC5	9	1	7
RC5	10	0	-

## Sheet: Fig S4C
Colony	Cell Number	Bridge Length (µm)	Midpoint Septum to furthest cell (µm)	Midpoint (µm)	Offest (µm)	Asymmetry
RC1	1	0.22	0.13	0.11	0.02	9.09091
RC1	2	0.91	0.78	0.455	0.325	35.7143
RC1	3	0.38	0.29	0.19	0.1	26.3158
RC2	1	0.93	0.55	0.465	0.085	9.13978
RC2	2	0.46	0.36	0.23	0.13	28.2609
RC2	3	1	0.91	0.5	0.41	41
RC2	4	0.54	0.31	0.27	0.04	7.40741
RC2	5	0.7	0.59	0.35	0.24	34.2857
RC2	6	0.48	0.24	0.24	0	0
RC2	7	1.29	0.65	0.645	0.005	0.387597
RC2	8	0.7	0.58	0.35	0.23	32.8571
RC2	9	0.91	0.46	0.455	0.005	0.549451
RC2	10	0.56	0.32	0.28	0.04	7.14286
RC3	1	0.27	0.14	0.135	0.005	1.85185
RC3	2	0.35	0.24	0.175	0.065	18.5714
RC3	3	0.58	0.46	0.29	0.17	29.3103
RC3	4	0.65	0.51	0.325	0.185	28.4615
RC3	5	0.93	0.53	0.465	0.065	6.98925
RC3	6	1.02	0.6	0.51	0.09	8.82353
RC3	7	0.74	0.38	0.37	0.01	1.35135
RC3	8	0.92	0.81	0.46	0.35	38.0435
RC3	9	0.76	0.45	0.38	0.07	9.21053
RC3	10	1.4	0.83	0.7	0.13	9.28571
RC4	1	0.96	0.56	0.48	0.08	8.33333
RC4	2	0.65	0.36	0.325	0.035	5.38462
RC4	3	0.99	0.58	0.495	0.085	8.58586
RC4	4	0.75	0.69	0.375	0.315	42
RC4	5	0.66	0.42	0.33	0.09	13.6364
RC4	6	0.42	0.23	0.21	0.02	4.7619
RC5	1	1.36	0.82	0.68	0.14	10.2941
RC5	2	1.37	0.69	0.685	0.005	0.364964
RC5	3	0.83	0.54	0.415	0.125	15.0602
RC5	4	0.75	0.52	0.375	0.145	19.3333
RC5	5	0.85	0.65	0.425	0.225	26.4706
RC5	6	0.81	0.53	0.405	0.125	15.4321

## Sheet: Fig S6A
	Cell ID	Cell 1	Cell 2	Cell 3	Cell 4	Cell 5		S1	S2	S3		C1	C2	C3
	Type	sponge	sponge	sponge	sponge	sponge		Single	Single	Single		Colonial	Colonial	Colonial
Cell Volume (µm3)	Plasma Membrane	108.56	75.35	107.37	83.95	100.29		26.81	32.34	26.68		18.89	21.54	41.82
Volumetric Proportion (%)	Nucleus	9.07	9.82	8.91	9.48	8.98		12.942	13.4817	12.3313		11.4875	11.3278	11.8604
	Nucleolus	0.57	0.49	0.42	0.63	0.55		1.67848	2.22635	1.64918		2.06458	2.08914	2.46294
	Mitochondria	2.36	2.39	3.01	2.25	2.48		6.30362	4.88559	4.08546		7.0937	6.49954	6.28886
	Endoplasmic Reticulum	1.32	1.98	1.52	1.32	1.03		2.87206	3.4632	3.48576		6.45844	7.24234	6.88666
	Food vacuoles	20.22	20.35	21.54	19.45	21.92		6.67661	8.84354	12.1439		6.40551	7.84587	6.28886
	Golgi Apparatus	0.11	0.29	0.22	0.18	0.14		0.522193	0.340136	0.224888		0.105876	0.232126	0.191296
	Glycogen Storage	0	0	0	0	0		7.4972	7.2047	11.4318		8.78772	6.77809	6.93448
Number	Microvilli	35	27	35	27	29		30	34	32		32	33	41
Number scaled against cell size (µm-3)	Food Vacuoles	0.39	0.29	0.25	0.42	0.27		0.16	0.25	0.41		0.26	0.37	0.22
	Mitochondria	1.15	1.07	1.3	0.79	1.17		1.19358	0.649351	0.824588		0.0529381	0.139276	0.215105
